# Supplementary material for: Significantly enhanced photocatalytic degradation towards tetracycline hydrochloride in BiVO4via surface defect engineering
Source: Royal Society of Chemistry journal article supplement (doi:10.1039/d4nj05487c), 2025-01-01
Supplement: d4nj05487c1.pdf [file d4nj05487c1.pdf]

## Supplementary Data

### Significantly enhanced photocatalytic degradation towards tetracycline hydrochloride in BiVO<sub>4</sub> via surface defect engineering

Lv Qian,<sup>a</sup> Junfu Xiong,<sup>b</sup> Xicheng Li,<sup>a</sup> Bicheng Ji,<sup>a</sup> Changzheng Wang<sup>\*a</sup>

<sup>a</sup> Beijing Key Laboratory of Functional Materials for Building Structure and Environment Remediation, Beijing University of Civil Engineering and Architecture, Beijing, 100044, China. E-mail: changzhwang@163.com

<sup>b</sup> Luzhou Xinglu Environmental Protection Development Co., Ltd, 646000, China.

#### Text S1 Computational methodology

Internal electron fields calculation

The IEF of the catalyst is calculated using the formula established by Kanata et al.<sup>1</sup>

$$E = \left( \frac{-2V_s \rho}{\epsilon \epsilon_0} \right)^{\frac{1}{2}} \quad (1)$$

Where E, V<sub>s</sub>, ρ, ε, and ε<sub>0</sub>, represent the range of IEF, surface voltage, surface charge density, low-frequency dielectric constant, and free-space dielectric constant, respectively. According to the above equations, the IEF can be quantitatively measured by photogenerated charge density and open circuit potential (OCP).

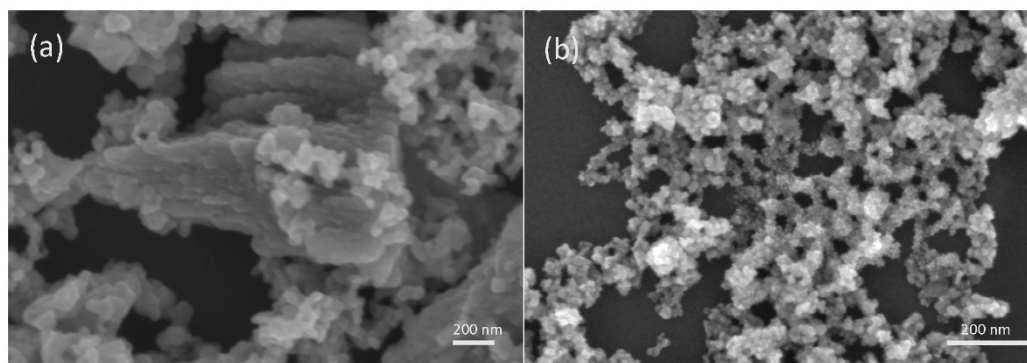

Fig.S1 SEM image of BVO (1) (a), SEM image of BVO (2) (b).

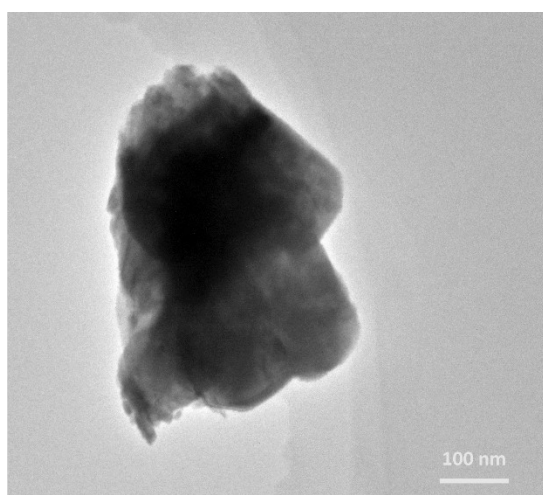

Fig. S2 TEM image of BVO (0.5).

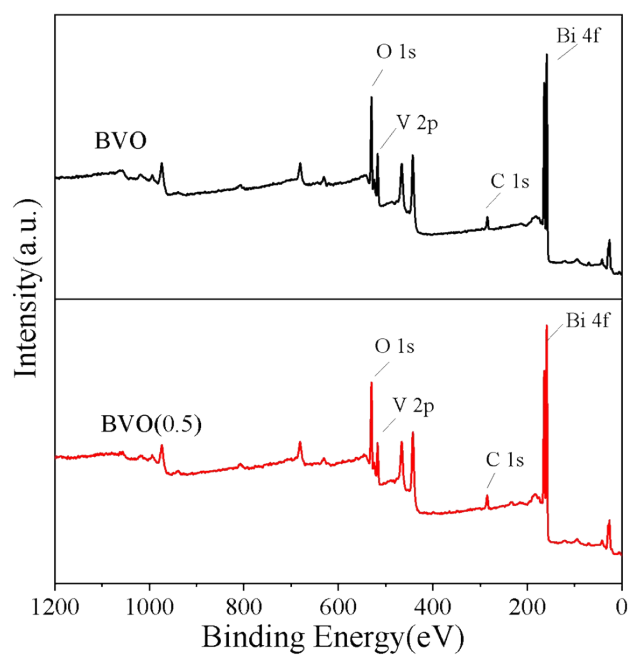

Fig. S3 XPS spectra of BVO and BVO (0.5).

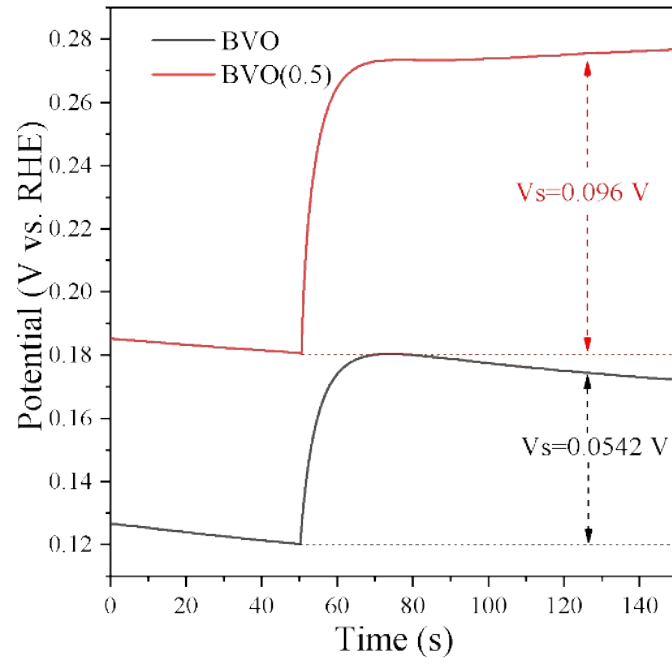

Fig. S4 Open current potential of BVO and BVO (0.5).

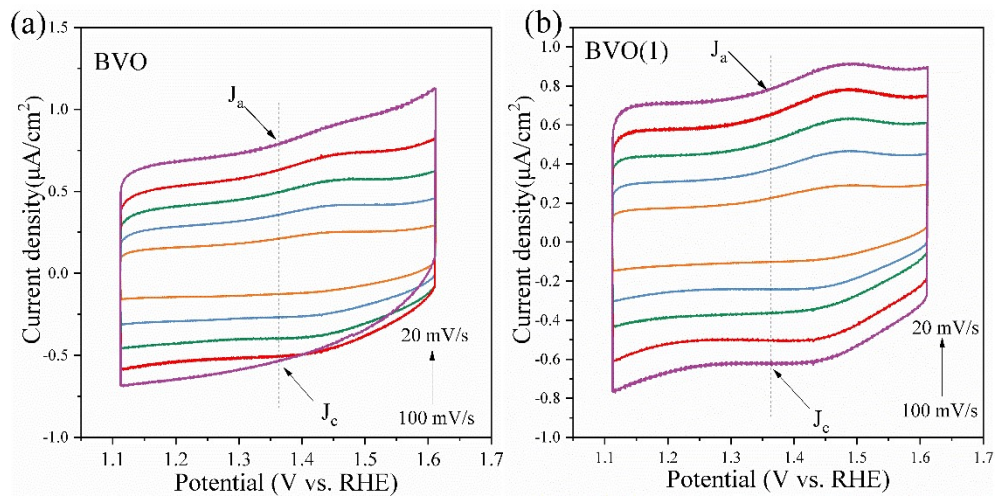

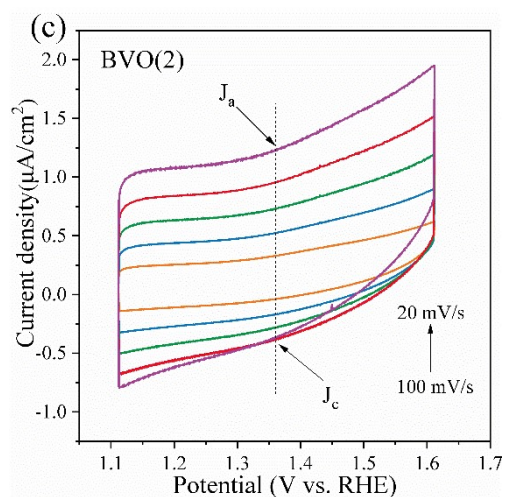

Fig. S5 CV curves at different scan rates of 20–100 mV/s in a non-faradaic reaction region of BVO (a), BVO(1) (b) and BVO (2) (c).

Table S1. The peak position and peak ratio of O 1s.

|               |                | BVO    | BVO(0.5) |
|---------------|----------------|--------|----------|
| Peak position | O <sub>L</sub> | 530.03 | 529.67   |
|               | O <sub>V</sub> | 531.34 | 530.56   |
|               | -OH            | 0      | 532.04   |
| Peak ratio    | O <sub>L</sub> | 83.21% | 71.32%   |
|               | O <sub>V</sub> | 16.79% | 25.76%   |
|               | -OH            | 0      | 2.92%    |

Table S2. Comparison with other photocatalysts for tetracycline degradation

| Photocatalysts                                            | Pollutant concentration<br>(mg/L) | Catalysts<br>Dosage (g/L) | Removal efficiency | Ref. |
|-----------------------------------------------------------|-----------------------------------|---------------------------|--------------------|------|
| CFs/g-C <sub>3</sub> N <sub>4</sub> /BiOBr                | 20                                | 3                         | 86.1%- 120 min     | 2    |
| CuInS <sub>2</sub> /Bi <sub>2</sub> MoO <sub>6</sub>      | 15                                | 0.6                       | 84.7%- 120 min     | 3    |
| BiOCl <sub>0.9</sub> /15%β-Bi <sub>2</sub> O <sub>3</sub> | 20                                | 0.4                       | 82.4%- 120 min     | 4    |
| CQDs/BiOCl/BiOBr                                          | 20                                | 0.3                       | 77%- 120 min       | 5    |

|                                   |    |      |                |           |
|-----------------------------------|----|------|----------------|-----------|
| BiOBr/SiC                         | 10 | 0.25 | 60%- 60 min    | 6         |
| Bi <sub>3</sub> O <sub>4</sub> Br | 20 | 0.5  | 77.7%- 120 min | 7         |
| BVO (0.5)                         | 10 | 0.2  | 86.3%-90min    | This work |

Reference:

1. P. Lefebvre, J. Allègre, B. Gil, H. Mathieu, N. Grandjean, M. Leroux, J. Massies and P. Bigenwald, *Physical Review B*, 1999, **59**, 15363-15367.
2. Z. Shi, Y. Zhang, X. Shen, G. Duoerkun, B. Zhu, L. Zhang, M. Li and Z. Chen, *Chemical Engineering Journal*, 2020, **386**.
3. J. Guo, L. Wang, X. Wei, Z. A. Alothman, M. D. Albaqami, V. Malgras, Y. Yamauchi, Y. Kang, M. Wang, W. Guan and X. Xu, *Journal of Hazardous Materials*, 2021, **415**.
4. X. Ma, K. Chen, B. Niu, Y. Li, L. Wang, J. Huang, H. She and Q. Wang, *Chinese Journal of Catalysis*, 2020, **41**, 1535-1543.
5. Q. Hu, M. Ji, J. Di, B. Wang, J. Xia, Y. Zhao and H. Li, *Journal of Colloid and Interface Science*, 2018, **519**, 263-272.
6. Z.-H. Hou, J.-P. Chen, L.-J. Xie, X.-X. Wei, S.-Q. Guo and C.-M. Chen, *Applied Surface Science*, 2021, **543**.
7. W. Zhang, Y. Peng, Y. Yang, L. Zhang, Z. Bian and H. Wang, *Chemical Engineering Journal*, 2022, **430**.
